# Supplementary material
Source: HighWire-hosted journal article supplement (http://molpharm.aspetjournals.org/highwire/filestream/88028/field_highwire_adjunct_files/0/568_supp_data.pdf)
Supplement: 568_supp_data.pdf [file 568_supp_data.pdf]

## SUPPLEMENTARY DATA

**Manuscript Number:** MOLPHARM-AR-2022-000568R1

**Journal Name:** Molecular Pharmacology

### **Valproic acid-induced upregulation of multidrug efflux transporter ABCG2/BCRP via PPAR $\alpha$ -dependent mechanism in human brain endothelial cells**

Samiksha Kukal<sup>1,2</sup>, Shivangi Bora<sup>1,3</sup>, Neha Kanojia<sup>1,2</sup>, Pooja Singh<sup>1,2</sup>, Priyanka Rani Paul<sup>1,2</sup>, Chitra Rawat<sup>1,2</sup>, Shakti Sagar<sup>1,2</sup>, Naveen Kumar Bhatraju<sup>1</sup>, Gurpreet Kaur Grewal<sup>4</sup>, Anju Singh<sup>5,6</sup>, Shrikant Kukreti<sup>5</sup>, Kapaettu Satyamoorthy<sup>7</sup>, Ritushree Kukreti<sup>1,2,\*</sup>

<sup>1</sup>Genomics and Molecular Medicine Unit, Institute of Genomics and Integrative Biology (IGIB), Council of Scientific and Industrial Research (CSIR), Delhi - 110007, India.

<sup>2</sup>Academy of Scientific and Innovative Research (AcSIR), Ghaziabad - 201002, India.

<sup>3</sup>Department of Biotechnology, Delhi Technological University, Shahbad Daultapur, Main Bawana Road, Delhi - 110042, India.

<sup>4</sup>Department of Molecular Biology and Genetic Engineering, School of Bioengineering and Biosciences, Lovely Professional University, Phagwara, Punjab - 144402, India.

<sup>5</sup>Nucleic Acids Research Lab, Department of Chemistry, University of Delhi (North Campus), Delhi 110007, India.

<sup>6</sup>Department of Chemistry, Ramjas College, University of Delhi (North Campus), Delhi 110007, India.

<sup>7</sup>Department of Cell and Molecular Biology, Manipal School of Life Sciences, Manipal Academy of Higher Education, Manipal, 576104, India.

\*Correspondence:

Ritushree Kukreti, PhD

Genomics and Molecular Medicine Unit, Institute of Genomics and Integrative Biology (Council of Scientific and Industrial Research), Mall Road, Delhi 110 007, India.

Phone: 91-11-27662202; Fax: 91-11-27667471; Email: ritushreekukreti@gmail.com; ritus@igib.res.in

### Supplemental Table 1

**Therapeutic plasma concentrations (reference range) of antiepileptic drugs in patients with epilepsy (Johannessen, 2004)**

| <b>Antiepileptic drug</b> | <b>Therapeutic plasma concentration range (<math>\mu\text{M}</math>)</b> | <b>Doses used in the present study</b> |
|---------------------------|--------------------------------------------------------------------------|----------------------------------------|
| Phenytoin                 | 40-80                                                                    | 40 $\mu\text{M}$ , 80 $\mu\text{M}$    |
| Carbamazepine             | 15-45                                                                    | 21 $\mu\text{M}$ , 42 $\mu\text{M}$    |
| Valproic acid             | 300-600                                                                  | 300 $\mu\text{M}$ , 600 $\mu\text{M}$  |
| Lamotrigine               | 10-60                                                                    | 15 $\mu\text{M}$ , 60 $\mu\text{M}$    |
| Topiramate                | 15-60                                                                    | 15 $\mu\text{M}$ , 60 $\mu\text{M}$    |
| Levetiracetam             | 35-120                                                                   | 40 $\mu\text{M}$ , 120 $\mu\text{M}$   |

## Supplemental Table 2

### Sequence of primers used for qPCR

| A. Primer sequences for MDTs and B2M           |                                 |                                   |
|------------------------------------------------|---------------------------------|-----------------------------------|
| Gene                                           | Forward Primer                  | Reverse Primer                    |
| <i>ABCC1</i>                                   | 5'-TGTGTGGGCAACTGCATCG-3'       | 5'-GTTGGTTTCCATTTTCAGATGACA-3'    |
| <i>ABCC2</i>                                   | 5'-ATATAAGAAGGCATTGACCC-3'      | 5'-ATCTGTAGAACACTTGACCA-3'        |
| <i>ABCC4</i>                                   | 5'-GAGCTGAGAATGACGCACAG-3'      | 5'-TACGCTGTGTTCAAAGCCAC-3'        |
| <i>ABCC5</i>                                   | 5'-GGGAGCTCTCAATGGAAGAC-3'      | 5'-CAGCTCTTCTTGCCACAGTC-3'        |
| <i>ABCG2</i>                                   | 5'- GAAGAGTGGCTTTCTACCTT -3'    | 5'- GTCCCAGGATGGCGTTGA -3'        |
| <i>B2M</i>                                     | 5'-GGCATTCTGAAGCTGACAG-3'       | 5'-TGGATGACGTGAGTAAACCTG-3'       |
| B. Primer sequences for molecular factor genes |                                 |                                   |
| Gene                                           | Forward Primer                  | Reverse Primer                    |
| <i>PXR</i>                                     | 5'-TGCGAGATCACCCGGAAGAC-3'      | 5'-ATGGGAGAAGGTAGTGTCAAAGG-3'     |
| <i>CAR</i>                                     | 5'- GTGCTTAGATGCTGGCATGAGGAA-3' | 5'-GGCTGGTGTGATGGATGAACAGATGAG-3' |
| <i>AhR</i>                                     | 5'-ACATCACCTACGCCAGTCGC-3'      | 5'-TCTATGCCGCTTGGAAGGAT-3'        |
| <i>PPARA</i>                                   | 5'-CTATCATTTGCTGTGGAGATCG-3'    | 5'-AAGATATCGTCCGGGTGGTT-3'        |
| <i>PPARG</i>                                   | 5'-AAGGAGAAGCTGTTGGCGGAGA-3'    | 5'-CAGCCCTGAAAGATGCGGATGG-3'      |
| <i>NRF2</i>                                    | 5'-GAGAGCCCAGTCTTCATTGC-3'      | 5'-TGCTCAATGTCTGTTGCAT-3'         |
| <i>NFKB1</i>                                   | 5'-GTGAAGGCCATCCCATGGT-3'       | 5'-TGTGACCAACTGAACAATAACC-3'      |
| <i>RELA</i>                                    | 5'-GCAGAAAGAGGACATTGAGGTG-3'    | 5'-CTGCATGGAGACACGCACAGGAG-3'     |
| <i>CREB1</i>                                   | 5'-ACTGTAACGGTGCCAACTCC-3'      | 5'-GAATGGTAGTACCCGGCTGA-3'        |
| <i>COX-2</i>                                   | 5'- CCTGTGCCTGATGATTGC -3'      | 5'-CTGATGCGTGAAGTGCTG-3'          |
| <i>TP53</i>                                    | 5'-TAACAGTTCCTGCATGGGCGGC-3'    | 5'-AGGACAGGCACAAACACGCACC-3'      |
| <i>GSK3B</i>                                   | 5'-GGTCTATCTTAATCTGGTGCTGG-3'   | 5'-TGGATATAGGCTAAACTTCGGAAC-3'    |
| <i>JNK1</i>                                    | 5'-TGGACTTGAGGAGAGAACC-3'       | 5'-CATTGACAGACGACGATGATG-3'       |
| <i>cJUN</i>                                    | 5'-TTCTATGACGATGCCCTCAACGC-3'   | 5'-GCTCTGTTTCAGGATCTTGGGGTTAC-3'  |
| <i>MAPK1</i>                                   | 5'-CGTGTTCAGATCCAGACCATGAT-3'   | 5'-TGGACTTGGTGTAGCCCTTGGAA-3'     |
| <i>MAPK3</i>                                   | 5'-ACCTGCGACCTTAAGATTTGTGA-3'   | 5'-AGCCACATACTCCGTCAGGAA-3'       |

|                                                                     |                            |                            |
|---------------------------------------------------------------------|----------------------------|----------------------------|
| <i>PIK3CA</i>                                                       | 5'-TGGATGCTCTACAGGGCTTT-3' | 5'-GTCTGGGTTCTCCCAATTCA-3' |
| <b>C. Primer sequences for PPAR<math>\alpha</math> target genes</b> |                            |                            |
| <b>Gene</b>                                                         | <b>Forward Primer</b>      | <b>Reverse Primer</b>      |
| <i>THBD</i>                                                         | AGCAAGCCCCACTTATTCCC       | GGGTGACTCAGGTGAGTTGG       |
| <i>PDK4</i>                                                         | GAGGTGGTGTCCCCTGAGAATT     | CAAAACCAGCCAAAGGAGCATT     |

PXR, pregnane X receptor; CAR, constitutive androstane receptor; AhR, aryl hydrocarbon receptor; PPARA, peroxisome proliferator activated receptor alpha; PPARG, peroxisome proliferator activated receptor gamma; NRF2, nuclear factor, erythroid 2 like 2; NFKB1, nuclear factor kappa B subunit 1; RELA; RELA proto-oncogene, NF-KB Subunit; CREB1, cAMP responsive element binding protein 1; COX-2, cyclooxygenase-2; TP53, tumor protein P53; GSK3B, glycogen synthase kinase 3 beta; JNK1, c-Jun N-terminal kinase-1; cJUN, Jun proto-oncogene, AP-1 transcription factor subunit; MAPK1, mitogen-activated protein kinase 1; MAPK3, mitogen-activated protein kinase 3; PIK3CA, phosphatidylinositol-4,5-bisphosphate 3-kinase catalytic subunit alpha; THBD, thrombomodulin; PDK4, pyruvate dehydrogenase lipoamide kinase isozyme 4

### Supplemental Table 3

#### Company source and assay IDs of the siRNAs used in this study.

| Gene Symbol               | Gene Name                                                                 | Catalog/Assay ID                 | Company       |
|---------------------------|---------------------------------------------------------------------------|----------------------------------|---------------|
| <i>AhR</i>                | Aryl hydrocarbon receptor                                                 | 4427038/ s1198                   | Thermofisher  |
| <i>PPARA</i>              | Peroxisome proliferator activated receptor alpha                          | 4427037/ s10881                  | Thermofisher  |
| <i>PPARG</i>              | Peroxisome proliferator activated receptor<br>gamma                       | 4427038/ s10886                  | Thermofisher  |
| <i>NRF2</i>               | Nuclear factor, erythroid 2 like 2                                        | 4427037/ s9491                   | Thermofisher  |
| <i>NFKB1</i>              | Nuclear factor kappa B subunit 1                                          | 4427037/ s9505                   | Thermofisher  |
| <i>RELA</i>               | RELA proto-oncogene, NF-KB Subunit                                        | 4427038/ s11914                  | Thermofisher  |
| <i>CREB1</i>              | cAMP responsive element binding protein 1                                 | 4427037/ s3489                   | Thermofisher  |
| <i>COX-2</i>              | Cyclooxygenase-2                                                          | 4427037/ s11472                  | Thermofisher  |
| <i>p53/TP53</i>           | Tumor protein P53                                                         | 4427038/ s607                    | Thermofisher  |
| <i>GSK3B</i>              | Glycogen synthase kinase 3 beta                                           | 4427038/ s6240                   | Thermofisher  |
| <i>MAPK1</i>              | Mitogen-activated protein kinase 1                                        | 4427038/ s11137                  | Thermofisher  |
| <i>MAPK3</i>              | Mitogen-activated protein kinase 3                                        | 4427038/ s11140                  | Thermofisher  |
| <i>PIK3CA</i>             | Phosphatidylinositol-4,5-bisphosphate 3-kinase<br>catalytic subunit alpha | 4427038/ s10520                  | Thermofisher  |
| Negative Control<br>No. 1 |                                                                           | 4390843                          | Thermofisher  |
| Gene Symbol               | Gene Name                                                                 | Product<br>Number/siRNA ID       | Company       |
| <i>JNK1</i>               | c-Jun N-terminal kinase-1                                                 | NM_002750/<br>SASI_Hs01_00010441 | Sigma-Aldrich |
| <i>cJUN</i>               | Jun proto-oncogene, AP-1 transcription factor<br>subunit                  | NM_002228/<br>SASI_Hs02_00333461 | Sigma-Aldrich |

## Supplemental Table 4

### Statistical analysis of data

| Figure                    | Comparative groups         | Mean difference<br>(95% Confidence<br>Interval of<br>difference) | P value | P value (Statistical<br>test)                |
|---------------------------|----------------------------|------------------------------------------------------------------|---------|----------------------------------------------|
| Fig. 1<br>(ABCC1/<br>B2M) | VC vs 300 $\mu$ M          | 0.00<br>(-0.05, 0.05)                                            | 0.97    | 0.74<br>(One-way ANOVA<br>with Tukey test)   |
|                           | VC vs 600 $\mu$ M          | -0.01<br>(-0.06, 0.04)                                           | 0.84    |                                              |
|                           | 300 $\mu$ M vs 600 $\mu$ M | 0.01<br>(-0.04, 0.06)                                            | 0.73    |                                              |
| Fig. 1<br>(ABCC2/<br>B2M) | VC vs 300 $\mu$ M          | -0.03<br>(-0.12, 0.07)                                           | 0.64    | 0.36<br>(One-way ANOVA<br>with Tukey test)   |
|                           | VC vs 600 $\mu$ M          | -0.05<br>(-0.14, 0.05)                                           | 0.33    |                                              |
|                           | 300 $\mu$ M vs 600 $\mu$ M | -0.02<br>(-0.11, 0.08)                                           | 0.82    |                                              |
| Fig. 1<br>(ABCC4/<br>B2M) | VC vs 300 $\mu$ M          | 0.05<br>(-0.08, 0.18)                                            | 0.50    | 0.15<br>(One-way ANOVA<br>with Tukey test)   |
|                           | VC vs 600 $\mu$ M          | 0.09<br>(-0.03, 0.22)                                            | 0.13    |                                              |
|                           | 300 $\mu$ M vs 600 $\mu$ M | 0.05<br>(-0.08, 0.17)                                            | 0.54    |                                              |
| Fig. 1<br>(ABCC5/<br>B2M) | VC vs 300 $\mu$ M          | -0.02<br>(-0.09, 0.06)                                           | 0.79    | 0.46<br>(One-way ANOVA<br>with Tukey test)   |
|                           | VC vs 600 $\mu$ M          | 0.02<br>(-0.06, 0.09)                                            | 0.79    |                                              |
|                           | 300 $\mu$ M vs 600 $\mu$ M | 0.03<br>(-0.04, 0.11)                                            | 0.43    |                                              |
| Fig. 1<br>(ABCG2/<br>B2M) | VC vs 300 $\mu$ M          | -0.23<br>(-0.34, -0.13)                                          | 0.001   | <0.001<br>(One-way ANOVA<br>with Tukey test) |
|                           | VC vs 600 $\mu$ M          | -0.38<br>(-0.49, -0.28)                                          | <0.001  |                                              |
|                           | 300 $\mu$ M vs 600 $\mu$ M | -0.15<br>(-0.25, -0.04)                                          | 0.01    |                                              |
| Fig. 2<br>(ABCG2/<br>B2M) | VC vs 300 $\mu$ M (6h)     | -0.14<br>(-0.21, -0.07)                                          | <0.001  | <0.001 (By time<br>points)                   |
|                           | VC vs 600 $\mu$ M (6h)     | -0.18<br>(-0.25, -0.11)                                          | <0.001  | <0.001 (By treatments)                       |

|                       |                                  |                         |        |                                                                                            |
|-----------------------|----------------------------------|-------------------------|--------|--------------------------------------------------------------------------------------------|
|                       | 300 $\mu$ M vs 600 $\mu$ M (6h)  | 0.04<br>(-0.03, 0.11)   | 0.65   | (Two-way ANOVA<br>with Tukey test)                                                         |
|                       | VC vs 300 $\mu$ M (12h)          | -0.20<br>(-0.27, -0.13) | <0.001 |                                                                                            |
|                       | VC vs 600 $\mu$ M (12h)          | -0.29<br>(-0.36, -0.22) | <0.001 |                                                                                            |
|                       | 300 $\mu$ M vs 600 $\mu$ M (12h) | 0.09<br>(0.02, 0.16)    | 0.005  |                                                                                            |
|                       | VC vs 300 $\mu$ M (24h)          | -0.23<br>(-0.30, -0.16) | <0.001 |                                                                                            |
|                       | VC vs 600 $\mu$ M (24h)          | -0.38<br>(-0.45, -0.31) | <0.001 |                                                                                            |
|                       | 300 $\mu$ M vs 600 $\mu$ M (24h) | 0.15<br>(0.08, 0.22)    | <0.001 |                                                                                            |
|                       | VC vs 300 $\mu$ M (48h)          | -0.16<br>(-0.23, -0.09) | <0.001 |                                                                                            |
|                       | VC vs 600 $\mu$ M (48h)          | -0.24<br>(-0.31, -0.17) | <0.001 |                                                                                            |
|                       | 300 $\mu$ M vs 600 $\mu$ M (48h) | 0.08<br>(0.01, 0.15)    | 0.015  |                                                                                            |
|                       |                                  |                         |        |                                                                                            |
| Fig. 3A<br>(BCRP/HSC) | VC vs 300 $\mu$ M (6h)           | -0.20<br>(-0.42, 0.03)  | 0.08   | <0.001 (By time<br>points)<br><0.001 (By treatments)<br>(Two-way ANOVA<br>with Tukey test) |
|                       | VC vs 600 $\mu$ M (6h)           | -0.02<br>(-0.08, 0.05)  | 0.99   |                                                                                            |
|                       | 300 $\mu$ M vs 600 $\mu$ M (6h)  | -0.06<br>(-0.12, 0.01)  | 0.10   |                                                                                            |
|                       | VC vs 300 $\mu$ M (12h)          | -0.16<br>(-0.23, -0.10) | <0.001 |                                                                                            |
|                       | VC vs 600 $\mu$ M (12h)          | -0.19<br>(-0.26, -0.13) | <0.001 |                                                                                            |
|                       | 300 $\mu$ M vs 600 $\mu$ M (12h) | 0.03<br>(-0.03, 0.09)   | 0.89   |                                                                                            |
|                       | VC vs 300 $\mu$ M (24h)          | -0.18<br>(-0.24, -0.12) | <0.001 |                                                                                            |
|                       | VC vs 600 $\mu$ M (24h)          | -0.21<br>(-0.28, -0.15) | <0.001 |                                                                                            |
|                       | 300 $\mu$ M vs 600 $\mu$ M (24h) | 0.03<br>(-0.03, 0.10)   | 0.80   |                                                                                            |
|                       | VC vs 300 $\mu$ M (48h)          | -0.24<br>(-0.30, -0.18) | <0.001 |                                                                                            |
|                       | VC vs 600 $\mu$ M (48h)          | -0.32<br>(-0.38, -0.26) | <0.001 |                                                                                            |
|                       | 300 $\mu$ M vs 600 $\mu$ M (48h) | 0.08<br>(0.02, 0.14)    | 0.004  |                                                                                            |
|                       | VC vs 300 $\mu$ M (72h)          | -0.18<br>(-0.25, -0.12) | <0.001 |                                                                                            |
|                       | VC vs 600 $\mu$ M (72h)          | -0.27<br>(-0.33, -0.21) | <0.001 |                                                                                            |
|                       | 300 $\mu$ M vs 600 $\mu$ M (72h) | 0.09<br>(0.03, 0.15)    | 0.001  |                                                                                            |
|                       |                                  |                         |        |                                                                                            |

|                            |                                  |                         |                       |                                                                                      |
|----------------------------|----------------------------------|-------------------------|-----------------------|--------------------------------------------------------------------------------------|
| Fig. 3C<br>(BCRP activity) | VC vs 300 $\mu$ M (12h)          | -0.03<br>(-0.11, 0.05)  | 0.98                  | <0.001 (By time points)<br><0.001 (By treatments)<br>(Two-way ANOVA with Tukey test) |
|                            | VC vs 600 $\mu$ M (12h)          | -0.08<br>(-0.15, 0.002) | 0.06                  |                                                                                      |
|                            | 300 $\mu$ M vs 600 $\mu$ M (12h) | 0.05<br>(-0.03, 0.13)   | 0.59                  |                                                                                      |
|                            | VC vs 300 $\mu$ M (24h)          | -0.08<br>(-0.16, 0.00)  | 0.048                 |                                                                                      |
|                            | VC vs 600 $\mu$ M (24h)          | -0.09<br>(-0.17, -0.01) | 0.02                  |                                                                                      |
|                            | 300 $\mu$ M vs 600 $\mu$ M (24h) | 0.01<br>(-0.07, 0.09)   | 1.00                  |                                                                                      |
|                            | VC vs 300 $\mu$ M (48h)          | -0.10<br>(-0.17, -0.02) | 0.01                  |                                                                                      |
|                            | VC vs 600 $\mu$ M (48h)          | -0.18<br>(-0.26, -0.11) | <0.001                |                                                                                      |
|                            | 300 $\mu$ M vs 600 $\mu$ M (48h) | 0.09<br>(0.01, 0.17)    | 0.02                  |                                                                                      |
|                            | VC vs 300 $\mu$ M (72h)          | -0.11<br>(-0.19, -0.03) | 0.001                 |                                                                                      |
|                            | VC vs 600 $\mu$ M (72h)          | -0.22<br>(-0.29, -0.14) | <0.001                |                                                                                      |
|                            | 300 $\mu$ M vs 600 $\mu$ M (72h) | 0.11<br>(0.03, 0.18)    | 0.002                 |                                                                                      |
|                            | Fig. 4A<br>(PHT)                 | Baseline vs 20 $\mu$ M  | 0.02<br>(0.004, 0.04) |                                                                                      |
| Baseline vs 40 $\mu$ M     |                                  | 0.01<br>(-0.01, 0.03)   | 0.44                  |                                                                                      |
| Baseline vs 80 $\mu$ M     |                                  | 0.02<br>(0.0003, 0.04)  | 0.047                 |                                                                                      |
| Baseline vs 160 $\mu$ M    |                                  | 0.02<br>(0.006, 0.04)   | 0.015                 |                                                                                      |
| Activated vs 20 $\mu$ M    |                                  | 0.01<br>(-0.04, 0.05)   | 0.99                  | 0.71<br>(One-way ANOVA with Dunnett test)                                            |
| Activated vs 40 $\mu$ M    |                                  | 0.02<br>(-0.03, 0.07)   | 0.50                  |                                                                                      |
| Activated vs 80 $\mu$ M    |                                  | 0.01<br>(-0.04, 0.06)   | 0.89                  |                                                                                      |
| Activated vs 160 $\mu$ M   |                                  | 0.006<br>(-0.04, 0.05)  | 0.99                  |                                                                                      |
| Fig. 4B<br>(CBZ)           | Baseline vs 10 $\mu$ M           | -0.01<br>(-0.06, 0.04)  | 0.93                  | 0.31<br>(One-way ANOVA with Dunnett test)                                            |
|                            | Baseline vs 20 $\mu$ M           | 0.02<br>(-0.04, 0.07)   | 0.69                  |                                                                                      |
|                            | Baseline vs 40 $\mu$ M           | -0.02<br>(-0.07, 0.03)  | 0.54                  |                                                                                      |
|                            | Baseline vs 80 $\mu$ M           | -0.008<br>(-0.06, 0.04) | 0.94                  |                                                                                      |
|                            | Activated vs 10 $\mu$ M          | -0.05<br>(-0.11, 0.002) | 0.06                  | 0.03                                                                                 |



|                  |                           |                         |        |                                               |
|------------------|---------------------------|-------------------------|--------|-----------------------------------------------|
|                  | Activated vs 20 $\mu$ M   | -0.05<br>(-0.10, 0.006) | 0.08   | (One-way ANOVA<br>with Dunnett test)          |
|                  | Activated vs 40 $\mu$ M   | -0.05<br>(-0.10, 0.01)  | 0.11   |                                               |
|                  | Activated vs 80 $\mu$ M   | -0.07<br>(-0.13, -0.02) | 0.014  |                                               |
|                  |                           |                         |        |                                               |
| Fig. 4C<br>(VPA) | Baseline vs. 75 $\mu$ M   | 0.07<br>(0.03, 0.10)    | 0.004  | 0.002<br>(One-way ANOVA<br>with Dunnett test) |
|                  | Baseline vs. 150 $\mu$ M  | 0.06<br>(0.02, 0.09)    | 0.008  |                                               |
|                  | Baseline vs. 300 $\mu$ M  | 0.09<br>(0.05, 0.13)    | 0.001  |                                               |
|                  | Baseline vs. 600 $\mu$ M  | 0.07<br>(0.03, 0.10)    | 0.004  |                                               |
|                  | Activated vs. 75 $\mu$ M  | -0.03<br>(-0.08, 0.02)  | 0.32   | 0.12<br>(One-way ANOVA<br>with Dunnett test)  |
|                  | Activated vs. 150 $\mu$ M | -0.02<br>(-0.07, 0.03)  | 0.47   |                                               |
|                  | Activated vs. 300 $\mu$ M | -0.03<br>(-0.08, 0.02)  | 0.32   |                                               |
|                  | Activated vs. 600 $\mu$ M | 0.02<br>(-0.03, 0.07)   | 0.70   |                                               |
|                  |                           |                         |        |                                               |
| Fig. 4D<br>(LTG) | Baseline vs. 15 $\mu$ M   | 0.03<br>(0.01, 0.05)    | 0.005  | 0.001<br>(One-way ANOVA<br>with Dunnett test) |
|                  | Baseline vs. 30 $\mu$ M   | 0.05<br>(0.03, 0.06)    | 0.001  |                                               |
|                  | Baseline vs. 60 $\mu$ M   | 0.05<br>(0.03, 0.07)    | <0.001 |                                               |
|                  | Baseline vs. 120 $\mu$ M  | 0.04<br>(0.02, 0.05)    | 0.002  |                                               |
|                  | Activated vs. 15 $\mu$ M  | -0.05<br>(-0.11, 0.002) | 0.06   | 0.03<br>(One-way ANOVA<br>with Dunnett test)  |
|                  | Activated vs. 30 $\mu$ M  | -0.05<br>(-0.10, 0.01)  | 0.08   |                                               |
|                  | Activated vs. 60 $\mu$ M  | -0.05<br>(-0.10, 0.01)  | 0.10   |                                               |
|                  | Activated vs. 120 $\mu$ M | -0.07<br>(-0.13, -0.02) | 0.014  |                                               |
|                  |                           |                         |        |                                               |
| Fig. 4E<br>(TPM) | Baseline vs. 30 $\mu$ M   | -0.007<br>(-0.05, 0.03) | 0.89   | 0.90<br>(One-way ANOVA<br>with Dunnett test)  |
|                  | Baseline vs. 60 $\mu$ M   | -0.004<br>(-0.04, 0.04) | 0.98   |                                               |
|                  | Baseline vs. 120 $\mu$ M  | -0.008<br>(-0.05, 0.03) | 0.86   |                                               |
|                  | Activated vs. 15 $\mu$ M  | 0.006<br>(-0.02, 0.03)  | 0.85   | 0.32<br>(One-way ANOVA<br>with Dunnett test)  |
|                  | Activated vs. 30 $\mu$ M  | 0.01<br>(-0.02, 0.04)   | 0.52   |                                               |

|                            |                                  |                         |        |                                                                                          |
|----------------------------|----------------------------------|-------------------------|--------|------------------------------------------------------------------------------------------|
|                            | Activated vs. 60 $\mu$ M         | 0.02<br>(-0.01, 0.05)   | 0.17   |                                                                                          |
|                            | Activated vs. 120 $\mu$ M        | 0.007<br>(-0.02, 0.03)  | 0.82   |                                                                                          |
|                            |                                  |                         |        |                                                                                          |
| Fig. 4F<br>(LEVI)          | Baseline vs. 25 $\mu$ M          | 0.004<br>(-0.06, 0.06)  | 0.10   | 0.49<br>(One-way ANOVA<br>with Dunnett test)                                             |
|                            | Baseline vs. 50 $\mu$ M          | -0.002<br>(-0.06, 0.06) | 1.00   |                                                                                          |
|                            | Baseline vs. 100 $\mu$ M         | 0.02<br>(-0.04, 0.08)   | 0.62   |                                                                                          |
|                            | Baseline vs. 200 $\mu$ M         | 0.02<br>(-0.04, 0.08)   | 0.52   |                                                                                          |
|                            | Activated vs. 25 $\mu$ M         | 0.003<br>(-0.03, 0.03)  | 0.98   | 0.38<br>(One-way ANOVA<br>with Dunnett test)                                             |
|                            | Activated vs. 50 $\mu$ M         | 0.005<br>(-0.02, 0.03)  | 0.90   |                                                                                          |
|                            | Activated vs. 100 $\mu$ M        | 0.01<br>(-0.02, 0.04)   | 0.52   |                                                                                          |
|                            | Activated vs. 200 $\mu$ M        | 0.02<br>(-0.01, 0.05)   | 0.25   |                                                                                          |
|                            |                                  |                         |        |                                                                                          |
| Fig. 5A<br>(PHT)           | VC vs 40 $\mu$ M                 | 0.06<br>(0.03, 0.09)    | <0.001 | <0.001<br>(One-way ANOVA<br>with Dunnett test)                                           |
|                            | VC vs 80 $\mu$ M                 | 0.10<br>(0.07, 0.12)    | <0.001 |                                                                                          |
|                            | VC vs KO143                      | 0.20<br>(0.18, 0.23)    | <0.001 |                                                                                          |
|                            |                                  |                         |        |                                                                                          |
| Fig. 5B<br>(VPA)           | VC vs 300 $\mu$ M                | 0.15<br>(0.10, 0.20)    | <0.001 | <0.001<br>(One-way ANOVA<br>with Dunnett test)                                           |
|                            | VC vs 600 $\mu$ M                | 0.20<br>(0.15, 0.25)    | <0.001 |                                                                                          |
|                            | VC vs KO143                      | 0.20<br>(0.15, 0.25)    | <0.001 |                                                                                          |
|                            |                                  |                         |        |                                                                                          |
| Fig. 5C<br>(LTG)           | VC vs 15 $\mu$ M                 | 0.20<br>(0.15, 0.26)    | <0.001 | <0.001<br>(One-way ANOVA<br>with Dunnett test)                                           |
|                            | VC vs 60 $\mu$ M                 | 0.19<br>(0.13, 0.24)    | <0.001 |                                                                                          |
|                            | VC vs KO143                      | 0.20<br>(0.15, 0.26)    | <0.001 |                                                                                          |
|                            |                                  |                         |        |                                                                                          |
| Fig. 6B<br>(ABCG2/<br>B2M) | SCR, VC vs SCR, VPA              | 1.27<br>(0.77, 1.77)    | <0.001 | <0.001 (By siRNA)<br><0.001 (By drug<br>treatment)<br>(Two-way ANOVA<br>with Tukey test) |
|                            | SCR, VC vs siPPAR $\alpha$ , VC  | -0.19<br>(-0.69, 0.32)  | 0.66   |                                                                                          |
|                            | SCR, VC vs siPPAR $\alpha$ , VPA | 0.19<br>(-0.32, 0.69)   | 0.65   |                                                                                          |

|                               |                                               |                         |        |                                                                                            |
|-------------------------------|-----------------------------------------------|-------------------------|--------|--------------------------------------------------------------------------------------------|
|                               | SCR, VPA vs siPPAR $\alpha$ , VC              | 1.46<br>(0.95, 1.96)    | <0.001 |                                                                                            |
|                               | SCR, VPA vs siPPAR $\alpha$ , VPA             | -1.08<br>(-1.59, -0.58) | 0.001  |                                                                                            |
|                               | siPPAR $\alpha$ , VC vs siPPAR $\alpha$ , VPA | 0.37<br>(-0.13, 0.88)   | 0.16   |                                                                                            |
|                               |                                               |                         |        |                                                                                            |
| Fig. 6D<br>(BCRP/<br>HSC)     | SCR, VC vs SCR, VPA                           | 1.16<br>(0.79, 1.52)    | <0.001 | <0.001 (By siRNA)<br><0.001 (By drug<br>treatment)<br>(Two-way ANOVA<br>with Tukey test)   |
|                               | SCR, VC vs siPPAR $\alpha$ , VC               | -0.06<br>(-0.43, 0.30)  | 0.94   |                                                                                            |
|                               | SCR, VC vs siPPAR $\alpha$ , VPA              | 0.22<br>(-0.14, 0.59)   | 0.28   |                                                                                            |
|                               | SCR, VPA vs siPPAR $\alpha$ , VC              | 1.22<br>(0.85, 1.59)    | <0.001 |                                                                                            |
|                               | SCR, VPA vs siPPAR $\alpha$ , VPA             | -0.93<br>(-1.30, -0.57) | <0.001 |                                                                                            |
|                               | siPPAR $\alpha$ , VC vs siPPAR $\alpha$ , VPA | 0.29<br>(-0.08, 0.65)   | 0.13   |                                                                                            |
|                               |                                               |                         |        |                                                                                            |
| Fig. 6E<br>(BCRP<br>activity) | SCR, VC vs SCR, VPA                           | 0.57<br>(0.47, 0.68)    | <0.001 | <0.001 (By siRNA)<br><0.001 (By drug<br>treatment)<br>(Two-way ANOVA<br>with Tukey test)   |
|                               | SCR, VC vs siPPAR $\alpha$ , VC               | -0.11<br>(-0.21, -0.00) | 0.04   |                                                                                            |
|                               | SCR, VC vs siPPAR $\alpha$ , VPA              | -0.03<br>(-0.13, 0.08)  | 0.84   |                                                                                            |
|                               | SCR, VPA vs siPPAR $\alpha$ , VC              | 0.68<br>(0.58, 0.78)    | <0.001 |                                                                                            |
|                               | SCR, VPA vs siPPAR $\alpha$ , VPA             | -0.60<br>(-0.70, -0.50) | <0.001 |                                                                                            |
|                               | siPPAR $\alpha$ , VC vs siPPAR $\alpha$ , VPA | 0.08<br>(-0.02, 0.18)   | 0.14   |                                                                                            |
|                               |                                               |                         |        |                                                                                            |
| Fig. 7B<br>(BCRP/<br>HSC)     | VC vs VPA                                     | 0.36<br>(0.20, 0.52)    | <0.001 | 0.003 (By -/+MK886)<br><0.001 (By drug<br>treatment)<br>(Two-way ANOVA<br>with Tukey test) |
|                               | VC vs VC+8 $\mu$ MMK886                       | -0.11<br>(-0.27, 0.05)  | 0.21   |                                                                                            |
|                               | VC vs VPA+8 $\mu$ MMK886                      | -0.05<br>(-0.21, 0.11)  | 0.77   |                                                                                            |
|                               | VPA vs VC+8 $\mu$ MMK886                      | 0.46<br>(0.30, 0.62)    | <0.001 |                                                                                            |
|                               | VPA vs VPA+8 $\mu$ MMK886                     | -0.40<br>(-0.56, -0.24) | <0.001 |                                                                                            |
|                               | VC+8 $\mu$ MMK886 vs<br>VPA+8 $\mu$ MMK886    | 0.06<br>(-0.10, 0.22)   | 0.65   |                                                                                            |
|                               |                                               |                         |        |                                                                                            |
| Fig. 7C<br>(BCRP<br>activity) | VC vs VPA                                     | -0.22<br>(-0.31, -0.12) | <0.001 | <0.001<br>(One-way ANOVA<br>with Tukey test)                                               |
|                               | VC vs VC+8 $\mu$ MMK886                       | 0.08<br>(-0.02, 0.17)   | 0.11   |                                                                                            |

|                                     |                                            |                          |        |                                                                                            |
|-------------------------------------|--------------------------------------------|--------------------------|--------|--------------------------------------------------------------------------------------------|
|                                     | VC vs VPA+8 $\mu$ MMK886                   | 0.02<br>(-0.08, 0.11)    | 0.94   |                                                                                            |
|                                     | VPA vs VC+8 $\mu$ MMK886                   | 0.29<br>(0.20, 0.39)     | <0.001 |                                                                                            |
|                                     | VPA vs VPA+8 $\mu$ MMK886                  | 0.23<br>(0.14, 0.33)     | <0.001 |                                                                                            |
|                                     | VC+8 $\mu$ MMK886 vs<br>VPA+8 $\mu$ MMK886 | -0.06<br>(-0.15, 0.03)   | 0.24   |                                                                                            |
|                                     |                                            |                          |        |                                                                                            |
| Fig. 8A<br>(PPAR $\alpha$ /<br>B2M) | VC vs 600 $\mu$ M (1h)                     | -0.03<br>(-0.10, 0.03)   | 0.80   | <0.001 (By time<br>points)<br><0.001 (By treatments)<br>(Two-way ANOVA<br>with Tukey test) |
|                                     | VC vs 600 $\mu$ M (3h)                     | -0.16<br>(-0.22, -0.09)  | <0.001 |                                                                                            |
|                                     | VC vs 600 $\mu$ M (6h)                     | -0.30<br>(-0.37, -0.24)  | <0.001 |                                                                                            |
|                                     | VC vs 600 $\mu$ M (12h)                    | -0.24<br>(-0.31, -0.18)  | <0.001 |                                                                                            |
|                                     | VC vs 600 $\mu$ M (24h)                    | -0.23<br>(-0.29, -0.16)  | <0.001 |                                                                                            |
|                                     | VC vs 600 $\mu$ M (48h)                    | -0.07<br>(-0.14, -0.004) | 0.03   |                                                                                            |
|                                     |                                            |                          |        |                                                                                            |
| Fig. 8B<br>(PPAR $\alpha$ /<br>HSC) | VC vs 600 $\mu$ M (1h)                     | -0.01<br>(-0.10, 0.07)   | 1.00   | <0.001 (By time<br>points)<br><0.001 (By treatments)<br>(Two-way ANOVA<br>with Tukey test) |
|                                     | VC vs 600 $\mu$ M (3h)                     | -0.21<br>(-0.29, -0.13)  | <0.001 |                                                                                            |
|                                     | VC vs 600 $\mu$ M (6h)                     | -0.14<br>(-0.22, -0.05)  | <0.001 |                                                                                            |
|                                     | VC vs 600 $\mu$ M (12h)                    | -0.05<br>(-0.13, 0.03)   | 0.57   |                                                                                            |
|                                     | VC vs 600 $\mu$ M (24h)                    | 0.01<br>(-0.07, 0.09)    | 1.00   |                                                                                            |
|                                     |                                            |                          |        |                                                                                            |
| Fig. 8D                             | VC vs 600 $\mu$ M (24h) – PDK4             | -0.22<br>(-0.25, -0.19)  | <0.001 | (Unpaired t-test)                                                                          |
|                                     | VC vs 600 $\mu$ M (24h) –<br>THBD          | -0.27<br>(-0.32, -0.22)  | <0.001 |                                                                                            |
|                                     |                                            |                          |        |                                                                                            |
| Fig. 9B                             | 0h cytosolic vs 3h cytosolic               | 0.10<br>(0.05, 0.15)     | <0.001 | <0.001<br>(One-way ANOVA<br>with Tukey test)                                               |
|                                     | 0h cytosolic vs 6h cytosolic               | 0.06<br>(0.002, 0.11)    | 0.04   |                                                                                            |
|                                     | 3h cytosolic vs 6h cytosolic               | -0.05<br>(-0.10, 0.01)   | 0.12   |                                                                                            |
|                                     | 0h nuclear vs 3h nuclear                   | -0.14<br>(-0.19, -0.08)  | <0.001 |                                                                                            |
|                                     | 0h nuclear vs 6h nuclear                   | -0.11<br>(-0.16, 0.06)   | <0.001 |                                                                                            |
|                                     | 3h nuclear vs 6h nuclear                   | 0.03<br>(-0.03, 0.08)    | 0.67   |                                                                                            |

|          |                                 |                         |        |                                             |
|----------|---------------------------------|-------------------------|--------|---------------------------------------------|
|          | 3h cytosolic vs 3h nuclear      | -0.24<br>(-0.29, -0.18) | <0.001 |                                             |
|          | 6h cytosolic vs 6h nuclear      | -0.17<br>(-0.22, -0.11) | <0.001 |                                             |
|          |                                 |                         |        |                                             |
| Fig. 9D  | 0h vs 3h                        | -0.13<br>(-0.19, -0.06) | 0.001  | 0.001<br>(One-way ANOVA<br>with Tukey test) |
|          | 0h vs 6h                        | -0.12<br>(-0.18, -0.05) | 0.002  |                                             |
|          | 3h vs 6h                        | 0.01<br>(-0.06, 0.07)   | 0.95   |                                             |
|          |                                 |                         |        |                                             |
| Fig. 10A | VC vs VPA (IgG)                 | -0.20<br>(-0.67, 0.27)  | 0.30   | (Unpaired t-test)                           |
|          | VC vs VPA (PPAR $\alpha$ ) – 3h | -0.82<br>(-1.06, -0.58) | <0.001 |                                             |
|          | VC vs VPA (PPAR $\alpha$ ) – 6h | -0.62<br>(-0.84, -0.40) | <0.001 |                                             |
|          |                                 |                         |        |                                             |
| Fig. 10C | VC vs VPA (pGL2-control)        | -0.01<br>(-0.05, 0.02)  | 0.44   | (Unpaired t-test)                           |
|          | VC vs VPA (pGL2-prom-<br>ABCG2) | -0.17<br>(-0.20, -0.13) | <0.001 | (Unpaired t-test)                           |

## Supplemental Data

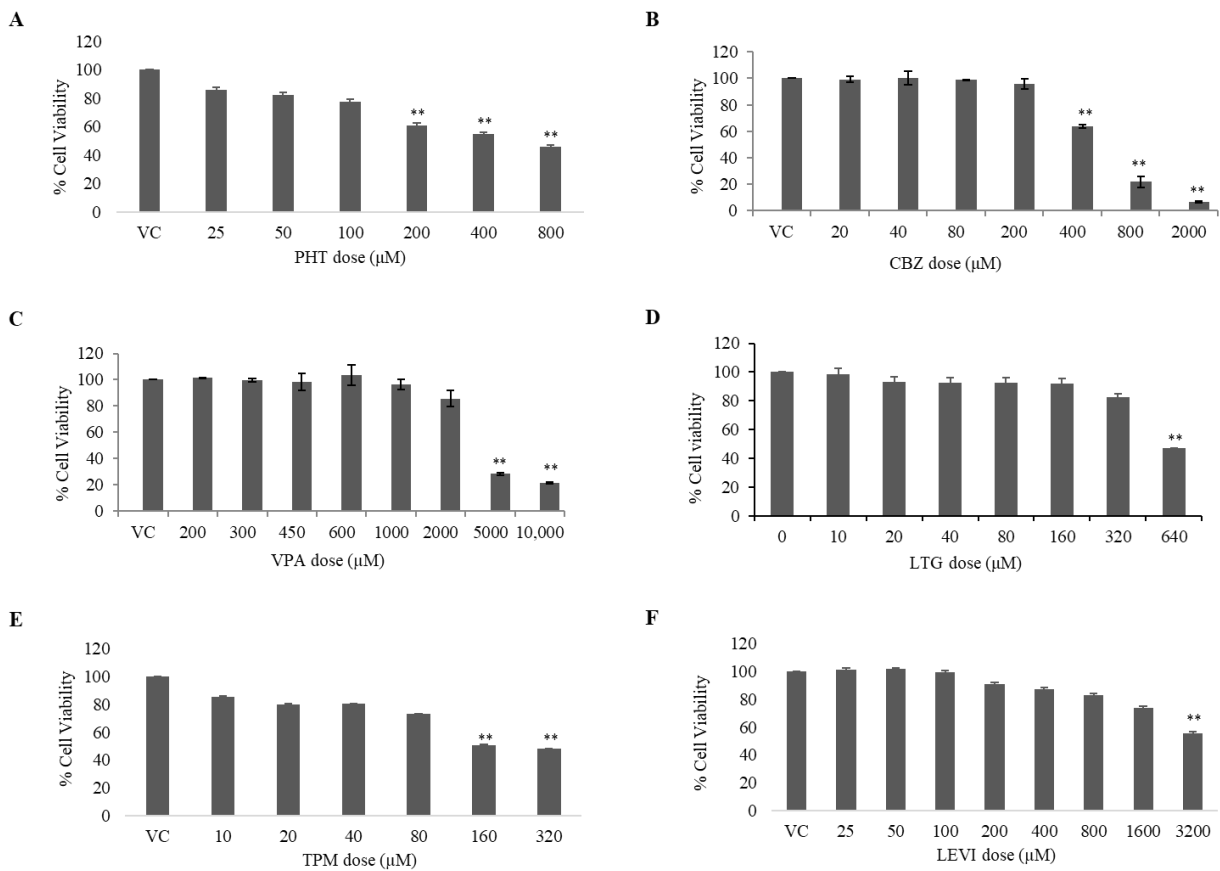

**Supplemental Fig. 1.** Effect of AEDs on hCMEC/D3 cell viability. Cells were treated with different doses of (A) phenytoin (PHT), (B) carbamazepine (CBZ), (C) valproic acid (VPA), (D) lamotrigine (LTG), (E) topiramate (TPM) and (F) levetiracetam (LEVI) for 72h. After treatment, cells were assessed for % viability using MTT assay. Data is the mean  $\pm$  S.D. of 4 independent experiments. \*\* $p < 0.01$ , compared to VC (One-way ANOVA with Dunnett's post hoc test).

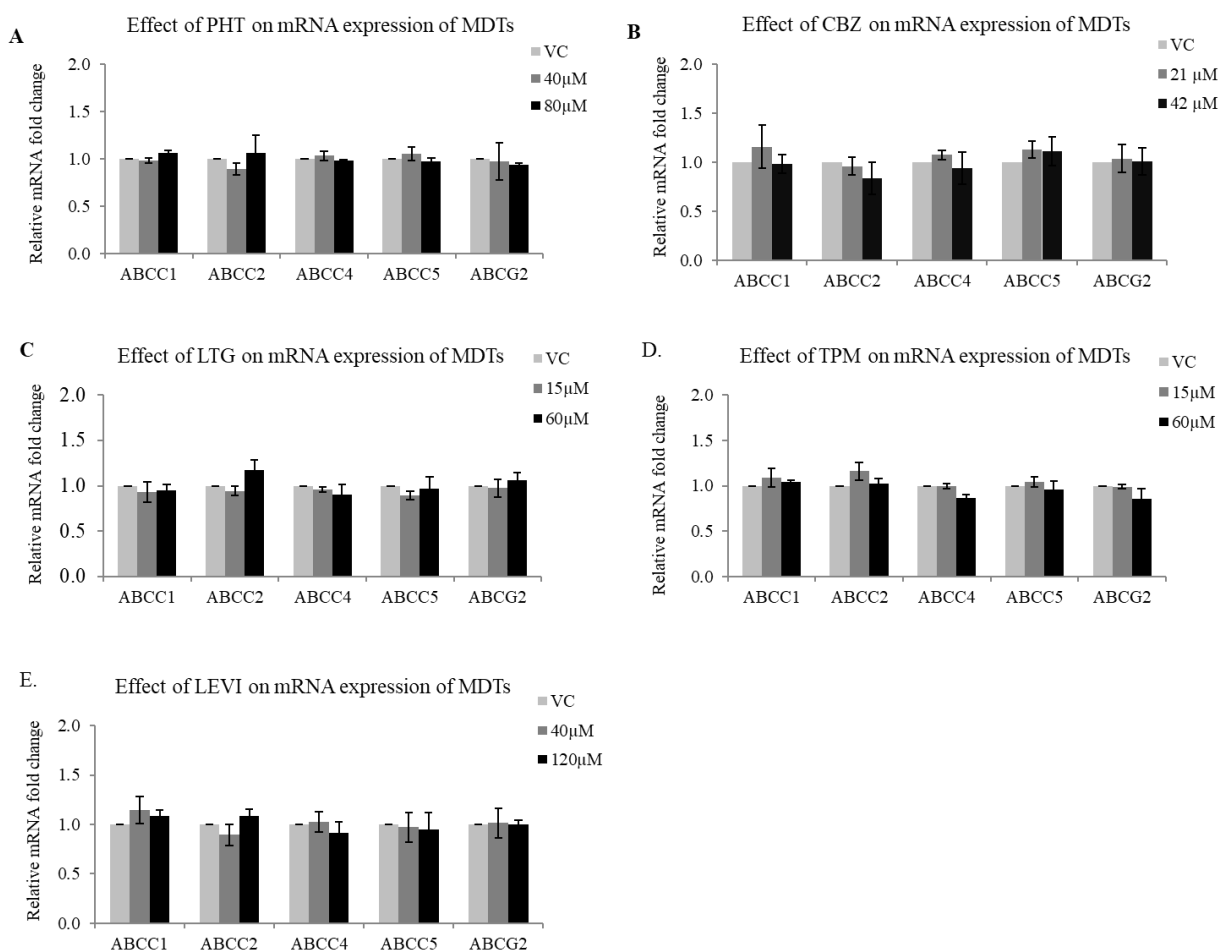

**Supplemental Fig. 2.** Effect of PHT, CBZ, LTG, TPM and LEVI on mRNA expression of MDTs in hCMEC/D3 cells. RT-qPCR analysis of ABCC1, ABCC2, ABCC4, ABCC5 and ABCG2 mRNA expression in hCMEC/D3 cells treated with (A) PHT (40 $\mu$ M, 80 $\mu$ M), (B) CBZ (21 $\mu$ M, 42 $\mu$ M), (C) LTG (15 $\mu$ M, 60 $\mu$ M), (D) TPM (15 $\mu$ M, 60 $\mu$ M) and (E) LEVI (40 $\mu$ M, 120 $\mu$ M) for 24h. The changes in mRNA levels of target genes were normalized with *B2M* and expressed as normalized fold change over VC (0.1% DMSO for PHT, CBZ, LTG and TPM; water for LEVI). The data is the mean  $\pm$  S.D. of 3 independent experiments.

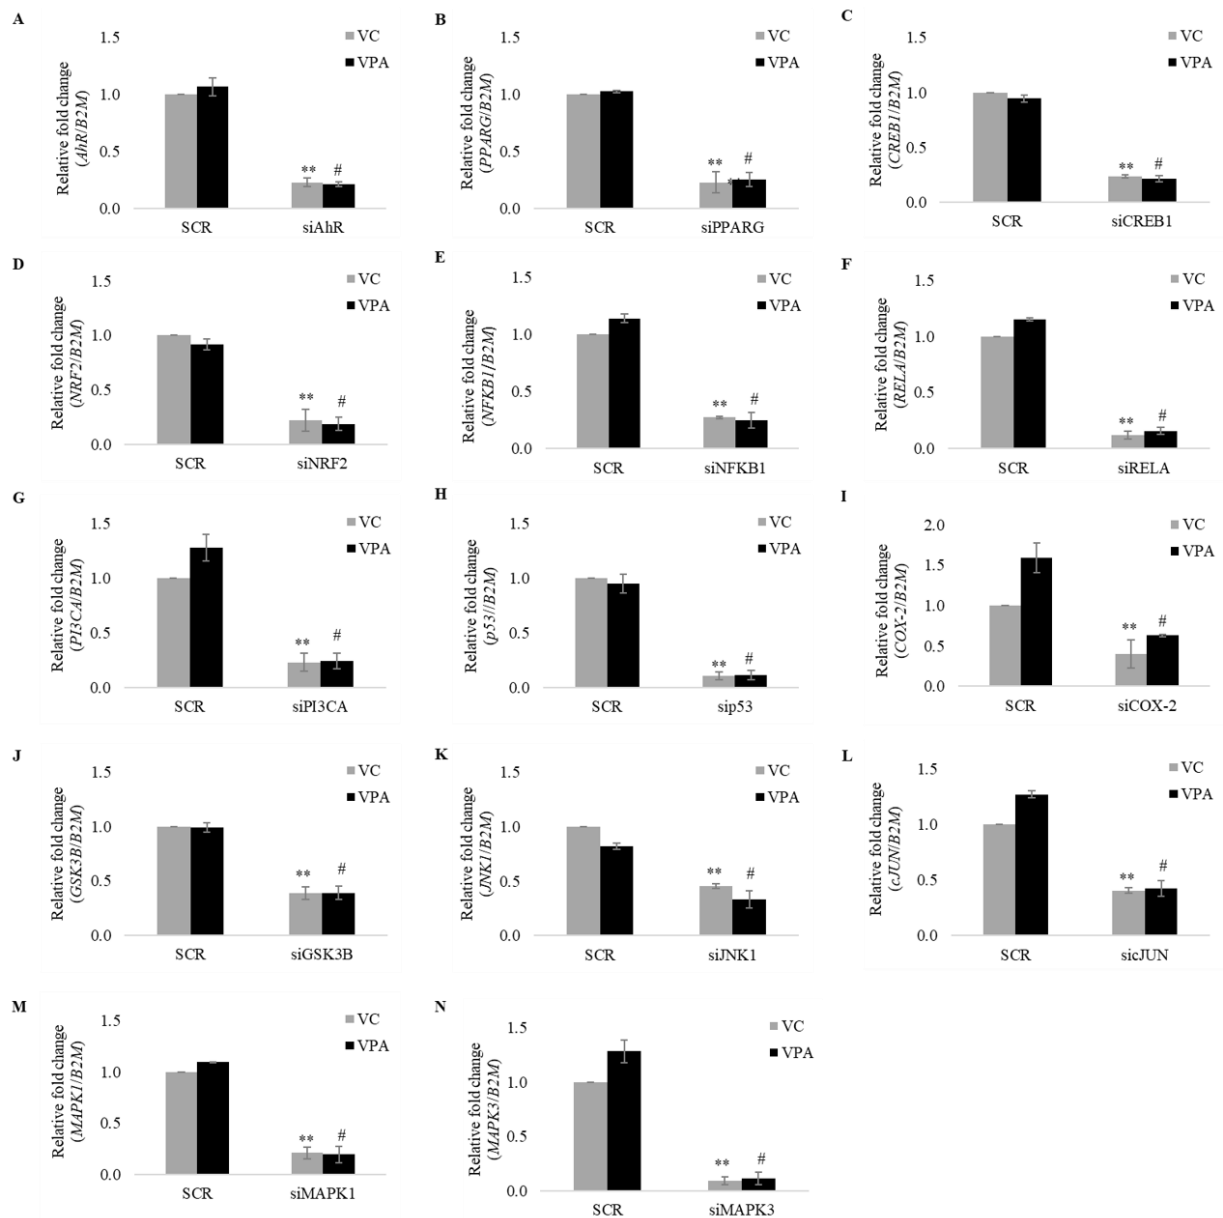

**Supplemental Fig. 3.** siRNA validation data for 14 molecular factors at mRNA level. hCMEC/D3 cells were transiently transfected with siRNA specific to (A) AhR, (B) PPARG, (C) CREB1, (D) NRF2, (E) NFKB1, (F) RELA, (G) PIK3CA, (H) p53, (I) COX-2, (J) GSK3B, (K) JNK1, (L) cJUN, (M) MAPK1, (N) MAPK3, or the non-targeting control (scramble, SCR). Subsequently, cells were treated with VC (0.1% DMSO) or VPA (600 μM) for 24h. RT-qPCR analysis was done to check the knockdown of each factor in VC-treated as well as VPA-treated group. The changes in mRNA level of each gene were normalized with B2M. The data is the mean ± S.D. of 3 independent experiments. \*\*P < 0.01, VC (SCR vs. siRNA); #P < 0.01 VPA (SCR vs. siRNA) (unpaired t-test).



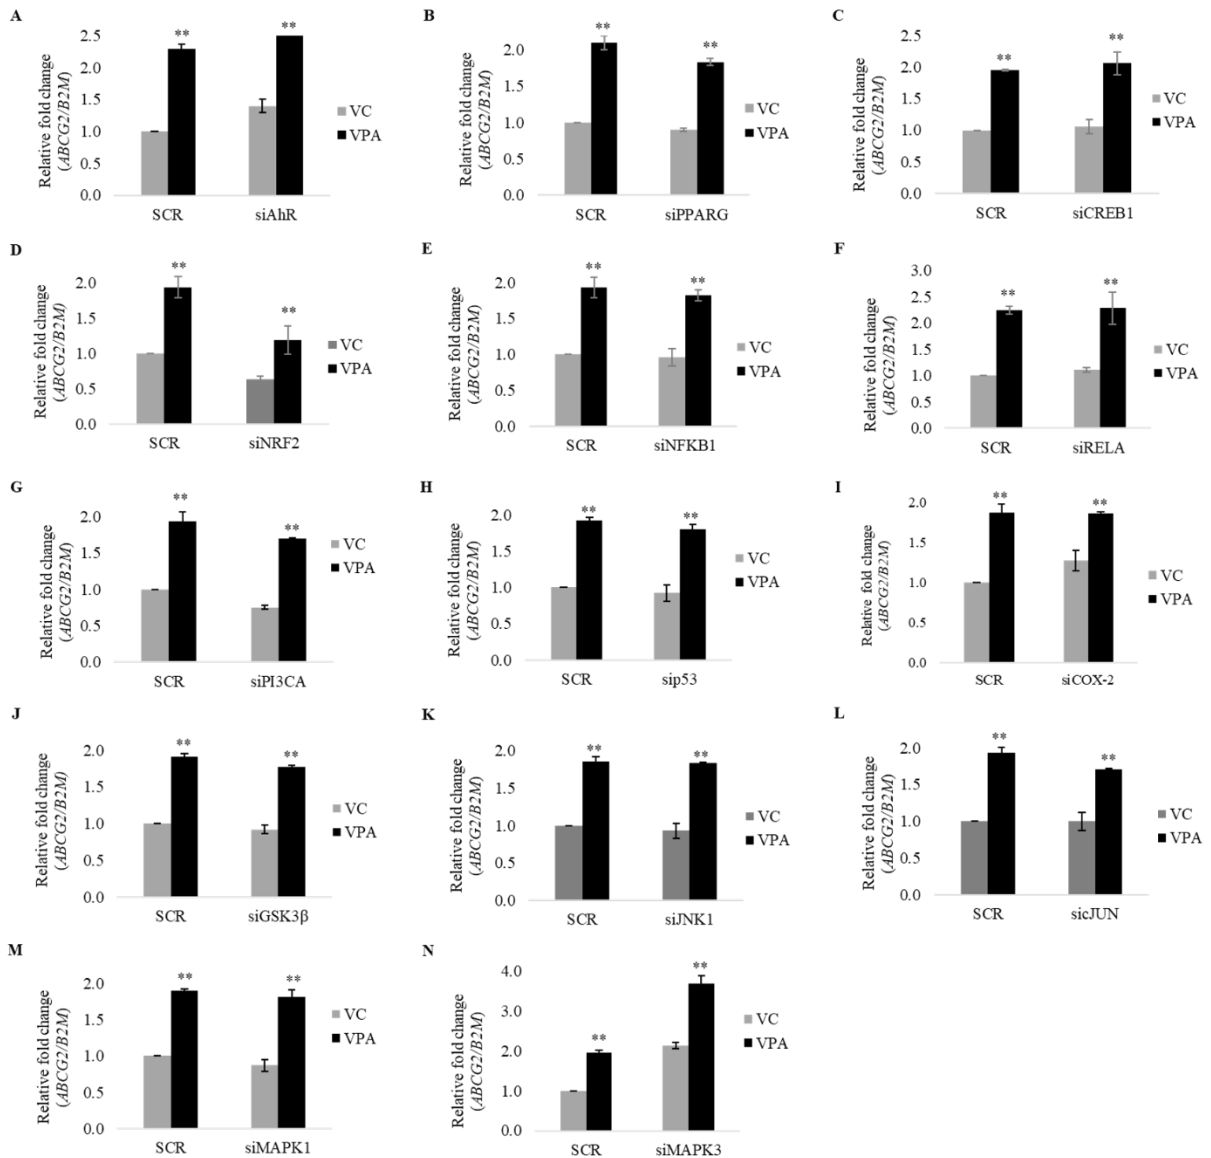

**Supplemental Fig. 4.** Effect of silencing of molecular factors on VPA-induced ABCG2 mRNA. Expression of the respective factors (A-N) was silenced by transient transfection of gene-specific siRNA in hCMEC/D3 cells. Then, the cells were treated with VC (0.1% DMSO) or VPA (600μM) for 24h and RT-qPCR analysis was done to check mRNA expression levels of ABCG2. Scramble (SCR) was used as non-targeting control. The changes in mRNA level of ABCG2 was normalized with *B2M*. The data is the mean  $\pm$  S.D. of 3 independent experiments. \*\* $P < 0.01$ , SCR (VC vs. VPA) and siRNA (VC vs. VPA) (Two-way ANOVA with Tukey's post hoc test).

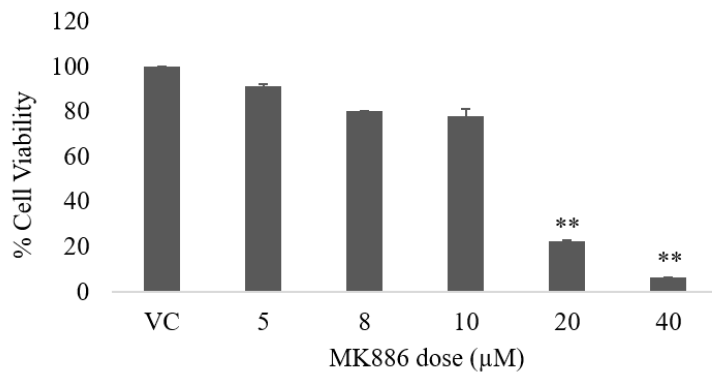

**Supplemental Fig. 5.** Effect of MK886 on hCMEC/D3 cell viability. Cells were treated with different doses of MK886 for 48h. After treatment, cells were assessed for % viability using MTT assay. Data is the mean  $\pm$  S.D. of 4 independent experiments. \*\* $p < 0.01$ , compared to VC (0.1% DMSO) (One-way ANOVA with Dunnett's post hoc test).

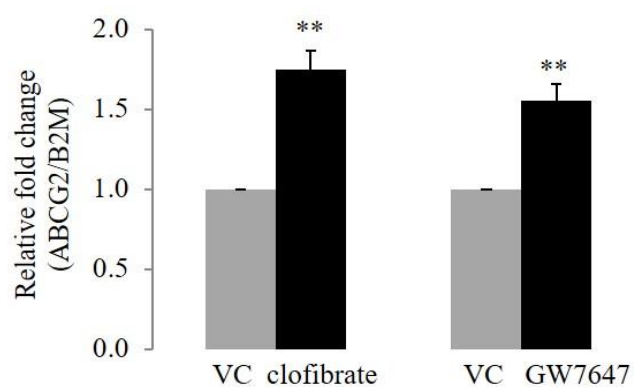

**Supplemental Fig. 6.** Effect of known PPAR $\alpha$  agonist on ABCG2 mRNA in hCMEC/D3 cells. RT-qPCR analysis of ABCG2 mRNA expression in hCMEC/D3 cells treated with 100 $\mu$ M clofibrate and 100nM GW7647 for 24h. The changes in the mRNA level were normalized with *B2M* and expressed as normalized fold change over VC (0.1% DMSO). The data is the mean  $\pm$  S.D. of 3 independent experiments. \*\* $p < 0.01$ , compared to VC (unpaired t-test).

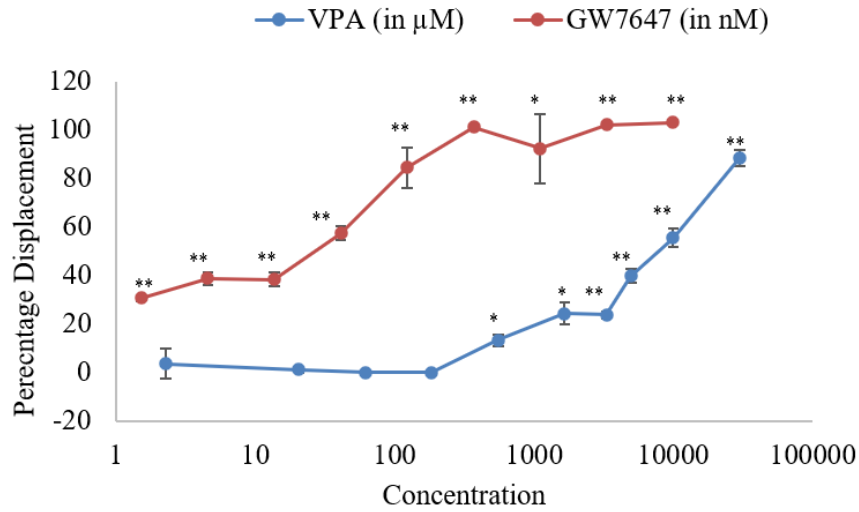

**Supplemental Fig. 7.** Binding of VPA to PPAR $\alpha$  LBD in a TR-FRET competitive binding assay. GW7647 was used as a known PPAR $\alpha$  agonist. Data is the mean  $\pm$  S.D. of 2 independent experiments. \* $p < 0.05$ , \*\* $p < 0.01$  compared to solvent control (1% DMSO, 0% displacement); One-way ANOVA with Dunnett's post hoc test.

## References

Johannessen SI (2004) Therapeutic drug monitoring of antiepileptic drugs, in *Drug Monitoring and Clinical Chemistry* (Hempel G ed) pp 221-253, Elsevier: Amsterdam, The Netherlands.
